# Supplementary material for: Activation of Muscarinic Receptors Mediated Varying Cholinergic Effects on Medullar 5-HT Neurons and Locomotor Activities in ePet-EYFP Mice
Source: Research Square preprint supplement (doi:10.21203/rs.3.rs-6559559/v1), 2025-05-06
Supplement: Supplementary file 1 [file 9db16432e227df3038cb3d51.docx]

Table S1. Distribution and density of ionic conductances in modeled neurons (mS/cm2)

| Model | NaT | NaP | K(DR) | K(AHP) | CaL | Leak |
| --- | --- | --- | --- | --- | --- | --- |
| 5-HT neuron |  |  |  |  |  |  |
| #1 | 3.0 | 0.08 | 0.5 | 0.032 | 0.01 | 0.03 |
| #2 | 3.2 | 0.08 | 0.45 | 0.028 | 0.012 | 0.03 |
| #3 | 3.4 | 0.07 | 0.48 | 0.03 | 0.015 | 0.035 |
| #4 | 3.5 | 0.075 | 0.5 | 0.025 | 0.02 | 0.028 |
| #5 | 3.0 | 0.075 | 0.55 | 0.032 | 0.012 | 0.03 |
| CIN neuron |  |  |  |  |  |  |
| #1 | 2.9 | 0.03 | 0.35 | 0.03 | 0.01 | 0.01 |
| #2 | 3.2 | 0.035 | 0.35 | 0.027 | 0.012 | 0.01 |
| #3 | 3.0 | 0.03 | 0.38 | 0.03 | 0.015 | 0.015 |
| #4 | 3.4 | 0.035 | 0.35 | 0.025 | 0.02 | 0.018 |
| #5 | 3.2 | 0.03 | 0.30 | 0.034 | 0.012 | 0.01 |
| Half-center neuron | |  |  |  |  |  |
| #1 | 3.0 | 0.03 | 0.45 | 0.033 | 0.02 | 0.01 |
| #2 | 2.8 | 0.045 | 0.45 | 0.032 | 0.03 | 0.02 |
| #3 | 3.2 | 0.04 | 0.4 | 0.03 | 0.035 | 0.015 |
| #4 | 2.6 | 0.045 | 0.47 | 0.035 | 0.025 | 0.03 |
| #5 | 2.8 | 0.048 | 0.46 | 0.034 | 0.02 | 0.02 |

CIN: commissural interneurons; NaT: transient sodium channel, NaP: persistent sodium channel, K(DR): delayed rectifier potassium channel), K(AHP): calcium-dependent potassium channel, CaL: L-type calcium channel, Leak: potassium-mediated leak channel.

| Table S2. Rate constants in CPG | | |
| --- | --- | --- |
|  | *α* | *β* |
| NaT | *αm=*10exp[0.1(Vm+34)] | *βm*=10exp[-0.1(Vm+34)] |
| *αh=*0.05exp[-0.125(Vm+29)] | *βh=*0.05exp[0.125(Vm+29)] |
| K(DR) | *αn=*0.05exp[0.125(Vm+29)] | *βn=*0.05exp[-0.125(Vm+29)] |
| NaP | *αm=*0.25exp[0.1(Vm+45)] | *βm*=0.25exp[-0.083(Vm+45)] |
| *αs=*5×10-5exp[-0.083(Vm+53)] | *βs=*5×10-5exp[0.083(Vm+53)] |
| K(AHP) | Steady-state | Time constant |
|  |  |
| CaL |  |  |

Table S3. Intrinsic membrane properties of 5-HT neurons in brainstem

|  | PPR (n=119) | MRN (n=67) | Total (n=186) | P (PPR vs. MRN) |
| --- | --- | --- | --- | --- |
| RMP (mV) | -63.3±6 | -65.9±6 | -64.1±6 | 0.01 |
| Rheobase (pA) | 30.1±23 | 31.7±25 | 30.6±24 | 0.4 |
| Vth (mV) | -32.9±7 | -32.6±8 | -32.8±7 | 0.2 |
| AP height (mV) | 38.8±9 | 39.9±10 | 39.2±9 | 0.4 |
| AHP depth (mV) | 19.8±8 | 21.1±10 | 20.3±8 | 0.9 |
| Rin (MΩ) | 1150.3±618 | 1312.4±712 | 1210.4±652 | 0.1 |

PPR: Parapyramidal region; MRN: Median Raphe Nuclei; RMP: resting membrane potential; rheobase: current threshold; Vth: voltage threshold; AP: action potential; AHP: after hyperpolarization; Rin: input resistance.

|  | MRN(n=14) | PPR(n=17) | Difference |
| --- | --- | --- | --- |
| Soma diameter (μm) | 10.5±2.8 | 12.9±2.6 | -2.5±1.0* |
| Soma area (μm ^2) | 564.0±231.8 | 803.6±278.4 | -239.6±93.3* |
| Soma volume (μm ^3) | 1242.4±691.3 | 2121.9±1103.1 | -879.5±339.6* |
| Total branches length (μm) | 582.3±367.3 | 1147.6±433.1 | -565.3±146.1** |
| Primary segments | 2.8±1.0 | 4.2±1.0 | -1.4±0.4** |
| Branch points | 2.2±1.3 | 4.7±3.2 | -2.5±0.9** |
| Number of branches | 5.1±0.9 | 8.8±4.1 | -3.7±1.0** |

Table S4. Morphology of 5-HT neurons in MRN and PPR

* p<0.05; ** p<0.01

Table S5. Morphology of pyramidal, stellate and bipolar cells.

|  | Pyramidal cells  (P, n=7) | Stellate cells  (S, n=16) | Bipolar cells  (B, n=8) | P-S | P-B | S-B |
| --- | --- | --- | --- | --- | --- | --- |
| Soma diameter(μm) | 12.9±2.9 | 12.3±2.5 | 9.9±3.2 | 0.6±1.3 | 3.0±1.4* | 2.5±1.2* |
| Soma area  (μm ^2) | 703.7±297.7 | 749.8±289.4 | 578.4±239.5 | -46.1±127.7 | 125.3±146 | 171.4±122 |
| Soma volume  (μm ^3) | 1814.0±1160.8 | 1915.8±1089.5 | 1264.3±696.4 | -101.8±463.5 | 549.7±529 | 651.5±443 |
| Primary segments | 3.7±1.5 | 4.1±0.9 | 2.4±0.7 | -0.4±0.5 | 1.3±0.5* | 1.7±0.4* |
| Branch points | 5.7±4.0 | 3.3±2.4 | 2.4±0.7 | 2.4±1.2* | 3.3±1.3* | 0.9±1.1 |
| Number of branches | 9.7±5.7 | 7.3±2.4 | 4.8±0.5 | 2.4±1.4 | 4.9±1.7* | 2.5±1.4 |
| Total branches length  (μm) | 1129.2±604.2 | 889.4±457.2 | 691.0±407.9 | 239.8±218.2 | 438.2±249 | 198.4±208 |

**: P<0.01; *:P<0.05 in paired Student’s t-test.

|  | ∆Em>0 (n=38) | | ∆Em<0 (n=8) | | ∆Em=0 (n=22) | |
| --- | --- | --- | --- | --- | --- | --- |
|  | Control | ACh | Control | ACh | Control | ACh |
| RMP (mV) | -61.0±3.5 | -52.9±2.7** | -68.7±6.9 | -74.6±10.7** | -64.6±4.3 | -64.1±3.6 |
| Rheobase(pA) | 18.7±4.2 | 12.4±3.6** | 37.0±9.7 | 47.5±8.9** | 37.9±7.7 | 41.9±7.5 |
| AP Height(mV) | 57.0±7.3 | 49.4±3.2* | 42.5±6.3 | 39.0±1.9* | 42.7±6.7 | 39.8±5.4 |
| AHP(mV) | 24.7±3.7 | 18.9±3.3** | 26.3±2.5 | 23.0±4.1* | 21.9±4.5 | 19.2±3.7 |
| Rin(MW) | 1175.3±205.3 | 841.5±218.1** | 1193.0±109.1 | 971.0±135.0* | 1215.7±153.2 | 1140.4±122.9 |

Table S6. Cholinergic modulation of 5-HT neurons.

**: P<0.01; *:P<0.05 in paired Student’s t-test.

Table S7. Atropine antagonized the ACh effects on 5-HT neurons

|  | ∆Em<0 in ACh (n=8) | | | ∆Em ≥ 0 in ACh (n=6) | | |
| --- | --- | --- | --- | --- | --- | --- |
|  | Control | ACh | Atropine | Control | ACh | Atropine |
| RMP (mV) | -63.7±5 | -52.5±13.7* | -59.2±6* | -60.1±2 | -64.2±3* | -59.0±2* |
| Rheobase(pA) | 39.7±27 | 29.7±34* | 37.7±30* | 20.6±18 | 58.7±44** | 41.0±30** |
| AP height (mV) | 40.0±7 | 37.1±7* | 40.1±8* | 35.6±6 | 31.3±9* | 31.6±9 |
| AHP depth (mV) | 25.0±10 | 22.3±10* | 24.1±11* | 22.8±2 | 17.0±5** | 20.0±1* |
| Rin (MΩ) | 608.0±276 | 496.7±225* | 560.0±281* | 1080.0±504 | 783.8±441* | 986.0±664* |

**: P<0.01; *:P<0.05 in paired Student’s t-test.

Table S8. Muscarine modulation of 5-HT neurons

|  | ∆Em>0 (n=99) | | ∆Em<0 (n=26) | | ∆Em=0 (n=57) | |
| --- | --- | --- | --- | --- | --- | --- |
|  | Control | Muscarine | Control | Muscarine | Control | Muscarine |
| RMP (mV) | -61.2±9.1 | -54.3±10.7*** | -59.1±7 | -64.9±7*** | -61.4±8 | -61.1±6 |
| Rheobase(pA) | 22.7±7.6 | 17.7±7.8** | 22.8±8 | 37.3±11* | 17.1±11 | 20.0±13 |
| AP Height(mV) | 53.4±7 | 49.3±7*** | 57.0±6 | 54.0±7* | 59.9±12 | 54.1±8 |
| AHP(mV) | 21.5±8 | 18±7* | 22.5±8 | 20.2±9* | 22.7±6 | 18.0±8 |
| Rin(MW) | 1225±429 | 1037±441** | 1174.5±452 | 948.2±468* | 1161.8±448 | 1023.1±618 |

**: P<0.01; *:P<0.05 in paired Student’s t-test.

Table S9. The effects of M1 receptor antagonists

|  | Control | Muscarine | Telenzepine(n=8) |
| --- | --- | --- | --- |
| RMP (mV) | -56.3±8.1 | -49.7±5.7* | -48.4±6 |
| Rheobase(pA) | 23.6±16.2 | 15.0±9.6* | 17.9±16.7 |
| AP height (mV) | 56.5±13.7 | 50.0±13.8* | 48.5±17.4 |
| AHP depth (mV) | 19.3±4.8 | 14.7±4.2* | 15.2±4.5 |
| Rin (MΩ) | 858.9±417.1 | 652.7±321.1* | 577.2±252.2 |

*:P<0.05 in paired Student’s t-test.

Table S10. The effects of M3 receptor antagonists

|  | Control | Muscarine | 4-DAMP(n=16) |
| --- | --- | --- | --- |
| RMP (mV) | -57.0±6.4 | -51.0±6.1*** | -57.0±7* |
| Rheobase(pA) | 14.1±7.3 | 8.1±6.1*** | 15.0±7.5* |
| AP height (mV) | 59.1±5.5 | 51.9±7.2*** | 56.5±6.9* |
| AHP depth (mV) | 23.2±5.2 | 19.9±5** | 22.4±4.9* |
| Rin (MΩ) | 1021.0±342.8 | 844.8±310.2** | 981.3±324.5* |

***: P<0.001;**: P<0.01;*:P<0.05 in paired Student’s t-test.

Table S11. The effects of M5 receptor antagonists

|  | Control | Muscarine | UV6008667(n=8) |
| --- | --- | --- | --- |
| RMP (mV) | -57.8±2.6 | -48.2±4.2** | -48.6±4.5 |
| Rheobase(pA) | 15.0±7.1 | 4.0±3.7*** | 5.0±5.5 |
| AP height (mV) | 53.1±4 | 46.9±3.1* | 46.5±2.7 |
| AHP depth (mV) | 22.9±3.1 | 20.8±3.5** | 20.0±3.4 |
| Rin (MΩ) | 993.4±311 | 709.1±189.4** | 699.8±152.2 |

***: P<0.001;**: P<0.01;*:P<0.05 in paired Student’s t-test.

Table S12. The effects of M2 receptor antagonists

|  | Control | Muscarine | Methoctramine(n=10) |
| --- | --- | --- | --- |
| RMP (mV) | -57.7±4.8 | -64.5±5.2* | -59.1±5.5* |
| Rheobase(pA) | 13.5±5.5 | 28.5±13.6* | 16.5±9.5* |
| AP height (mV) | 60.7±6 | 56.0±5.6* | 59.6±6.1* |
| AHP depth (mV) | 20.9±3.4 | 16.1±3.9* | 19.3±4.4* |
| Rin (MΩ) | 919.2±158.3 | 635.1±211.8* | 890.4±227.8* |

*:P<0.05 in paired Student’s t-test.

Table S13. The effects of M4 receptor antagonists

|  | Control | Muscarine | Tropicamide (n=9) |
| --- | --- | --- | --- |
| RMP (mV) | -57.1±3.5 | -62.4±2.8*** | -57.9±4*** |
| Rheobase(pA) | 11.1±9.7 | 21.1±12.2*** | 12.8±11.3** |
| AP height (mV) | 59.6±5.3 | 53.3±4.9** | 62.0±8.9** |
| AHP depth (mV) | 22.5±6.5 | 18.8±5.9** | 22.2±5.7** |
| Rin (MΩ) | 937.4±353.3 | 688.3±350.5*** | 900.6±357** |

***: P<0.001;**: P<0.01 in paired Student’s t-test.

Table S14. Fictive locomotion regulated by M2,M3 and M4 receptor antagonists

|  | Control | Methoctramine | Control | 4-DAMP | Control | Tropicamide |
| --- | --- | --- | --- | --- | --- | --- |
| Frequency (Hz) | 0.2±0.03 | 0.26±0.04** | 0.26±0.06 | 0.08±0.04*** | 0.19±0.02 | 0.24±0.02* |
| amplitude | 1±0.08 | 0.89±0.08 | 1±0.19 | 0.23±0.11**8 | 1±0.12 | 0.89±0.24 |

***: P<0.001;**: P<0.01;*:P<0.05 in paired Student’s t-test.
