# Supplementary material for: Activation of Muscarinic Receptors Mediated Varying Cholinergic Effects on Medullar 5-HT Neurons and Locomotor Activities in ePet-EYFP Mice
Source: Research Square preprint supplement (doi:10.21203/rs.3.rs-6559559/v1), 2025-05-06
Supplement: Supplementary file 1 [file 774597b3db05bb7c542adf11.pdf]

Fig S1

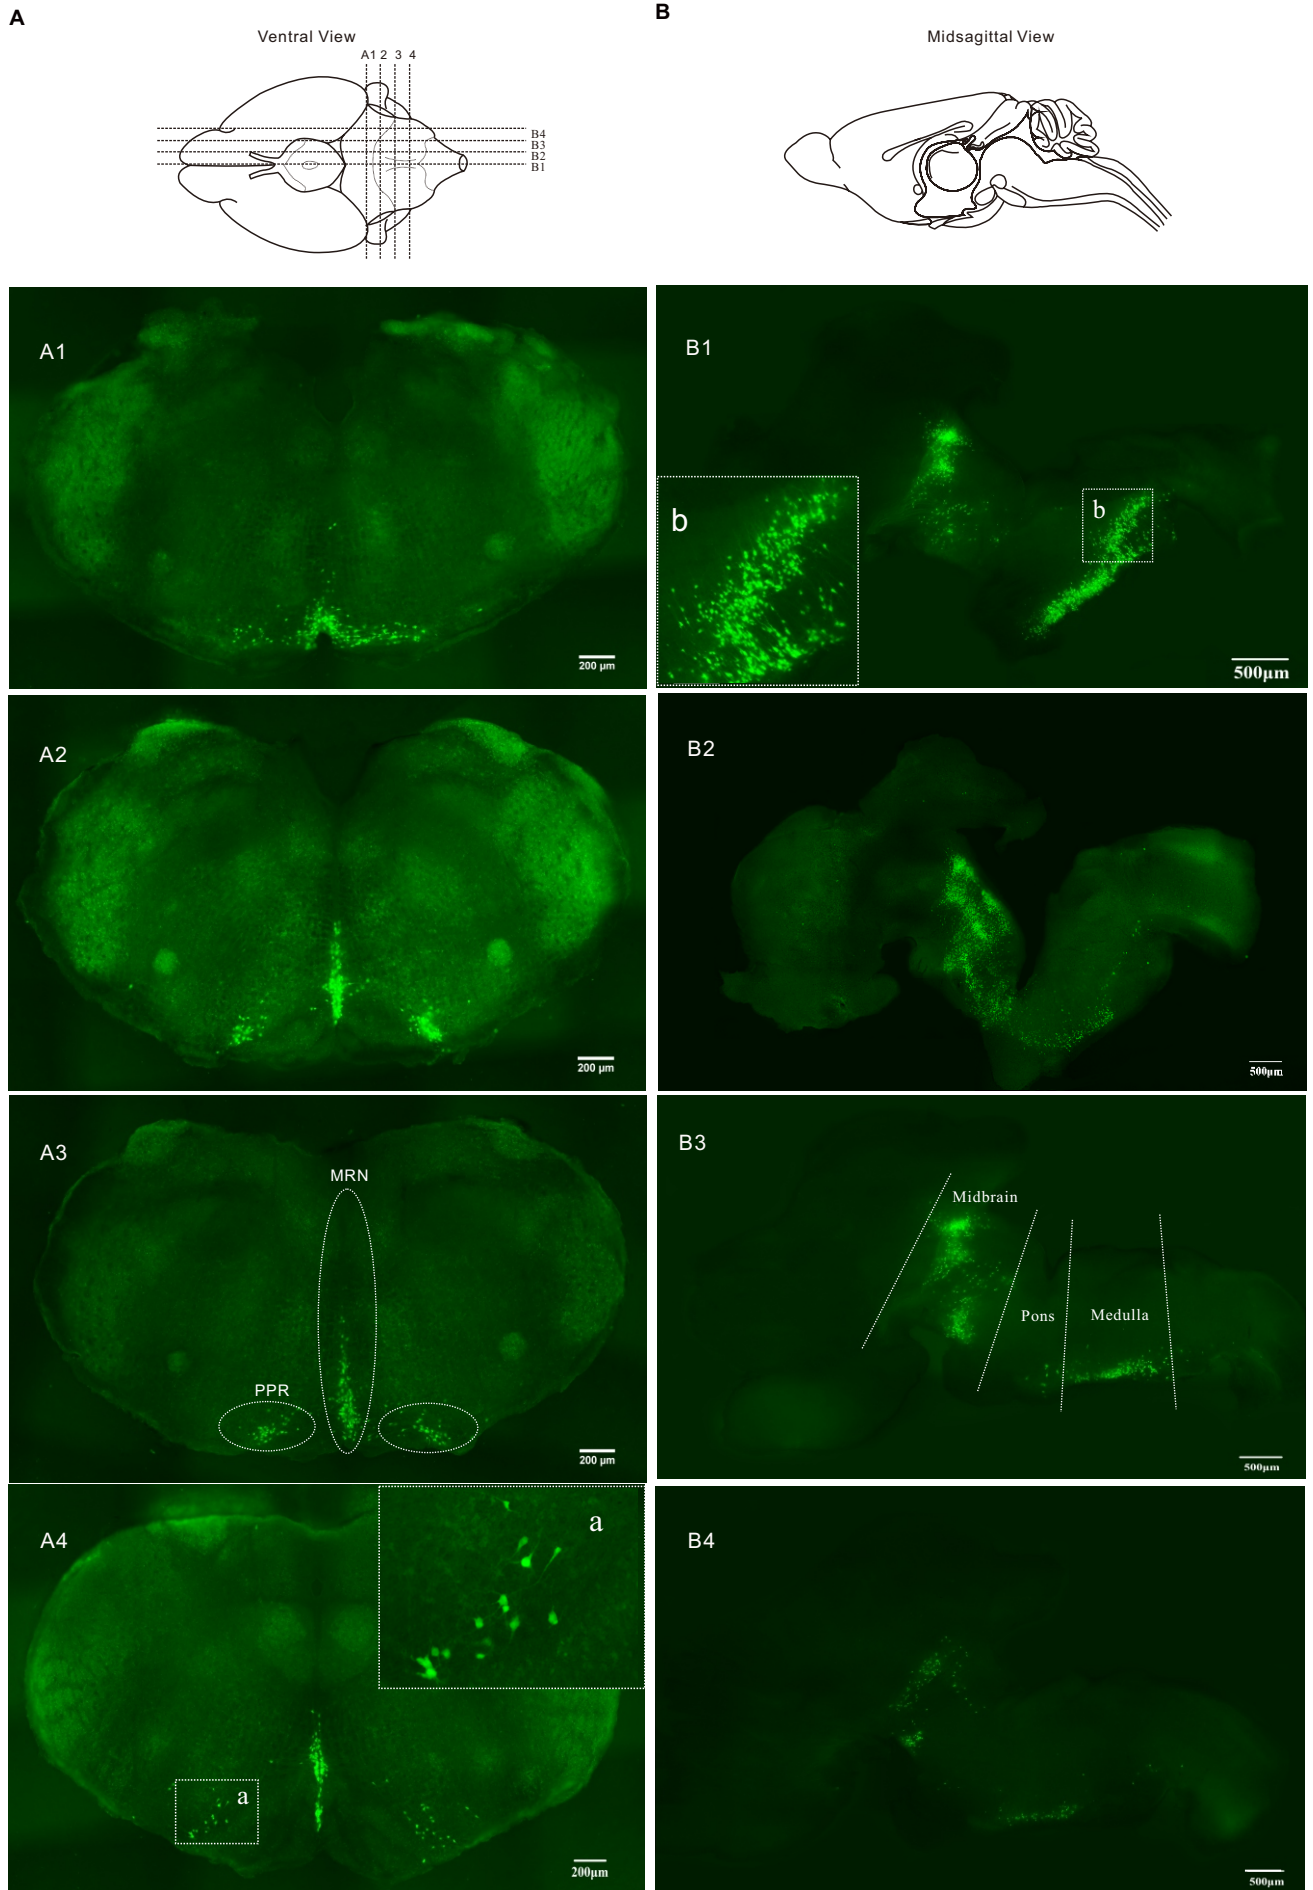

Fig S2

A

A1

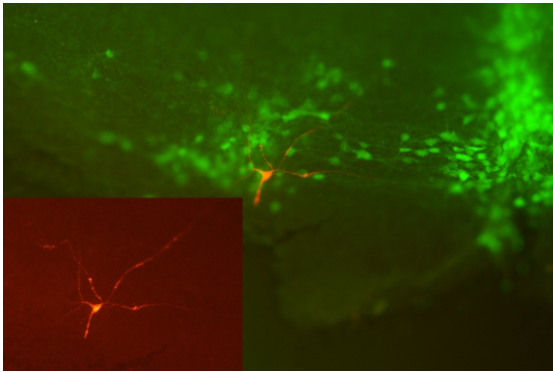

A2

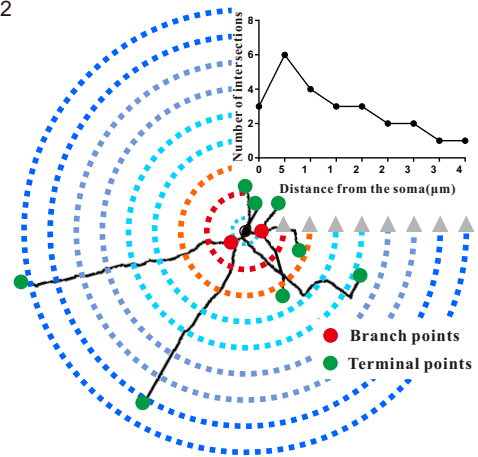

B

B1

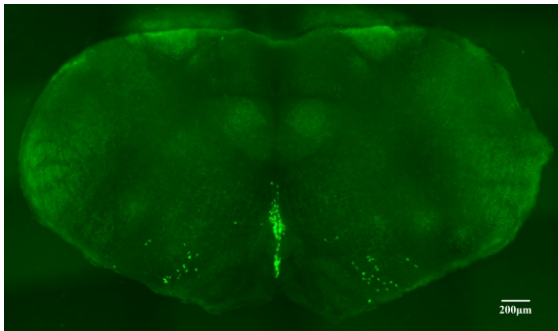

B2

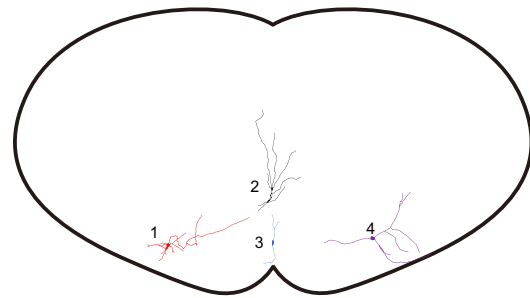

B3

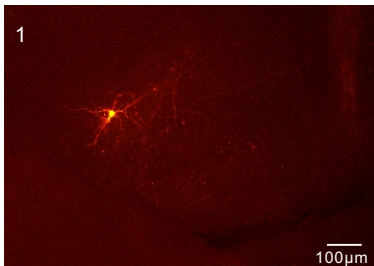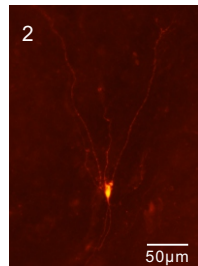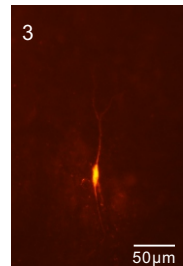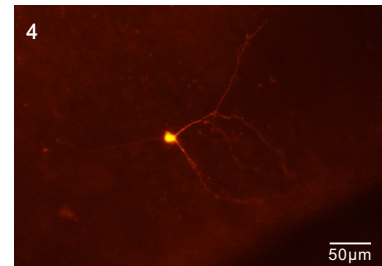

B4

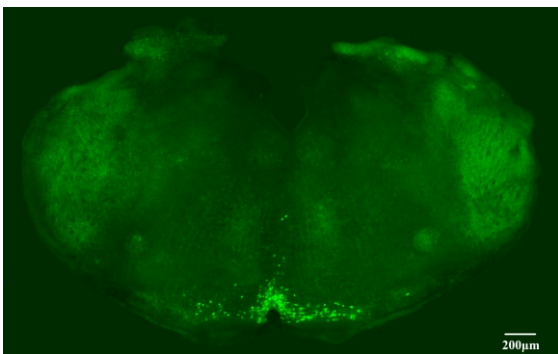

B5

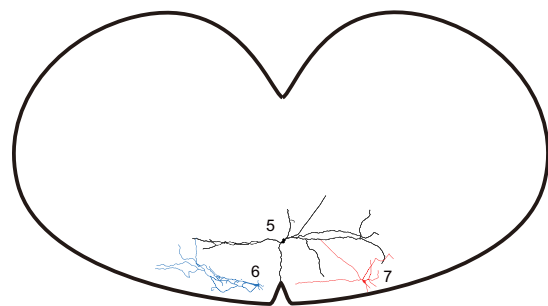

B6

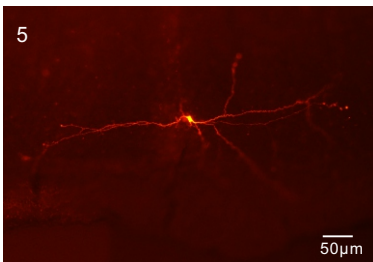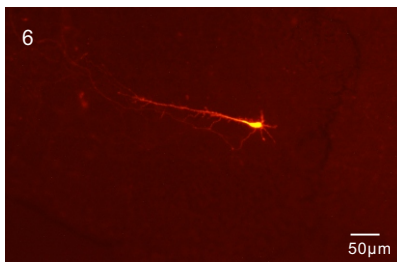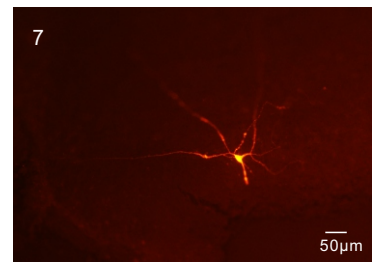

**Figure S1** Distribution of 5-HT neurons in the brainstem. Schematic diagram of a mouse brain (ventral view and midsagittal view). The dashed lines A1-A4 indicate the positions of the coronal slices, and the dashed lines B1-B4 indicate the positions of the sagittal slices. **A1-A4:** Distribution of 5-HT neurons in the medullary coronal slice. **A2.** Medullary slice with 5-HT neurons. **A3.** The dotted circles represent the two nuclei of 5-HT neuronal distribution: the parapyramidal region (PPR) and the midline raphe nuclei (MRN). **A4.** The dotted rectangle indicates detained morphology of 5-HT neurons in the PPR region. **B1-B4:** Distribution of 5-HT neurons in the brainstem sagittal slice. **B1.** The dotted rectangle indicates detained morphology of 5-HT neurons in the medulla. **B2.** Brainstem with 5-HT neurons. **B3.** The dashed line divides the brainstem into the midbrain, pons, and medulla. 5-HT neurons are distributed across the midbrain, pons, and medulla.

**Figure S2.** Morphology of 5-HT neurons. **A1.** An example of a 5-HT neuron labeled with the fluorescent dye Dextran tetramethylrhodamine. **A2.** Schematic diagram of the Sholl analysis used to obtain morphological parameters such as the number of intersections, branch points, and terminal points. **B.** Morphology of 5-HT neurons in medulla. **B1.** Cross-sectional slices of the medulla from transgenic mice (ePet-EYFP). **B2.** Diagram of the morphology of neurons 1-4. **B3.** Diagram of the staining neurons 1-4. **B4.** Cross-sectional slices of the medulla. **B5.** Schematic diagram of the morphology of neurons 5-7. **B6.** Diagram of the staining of neurons 5-7.
